# Supplementary material for: Unconventional direct synthesis of Ni3N/Ni with N-vacancies for efficient and stable hydrogen evolution
Source: Royal Society of Chemistry journal article supplement (doi:10.1039/d1ee02013g), 2021-10-26
Supplement: d1ee02013g1.pdf [file d1ee02013g1.pdf]

## **Supporting Information**

### **Unconventional Direct Synthesis of Ni<sub>3</sub>N/Ni with N-Vacancies for Efficient and Stable Hydrogen Evolution**

*Doudou Zhang, Haobo Li,\* Asim Riaz, Astha Sharma, Wensheng Liang, Yuan Wang, Hongjun Chen, Kaushal Vora, Di Yan, Zhen Su, Antonio Tricoli, Chuan Zhao, Fiona J. Beck, Karsten Reuter, Kylie Catchpole,\* and Siva Karuturi\**

Dr. Doudou Zhang, Ms. Astha Sharma, Dr. Wensheng Liang, Dr Fiona J. Beck, Dr. Di Yan, Dr. Hongjun Chen, Prof. Antonio Tricoli, Prof. Kylie Catchpole and Dr. Siva Karuturi  
School of Engineering, The Australian National University Canberra, ACT 2601, Australia

Dr. Haobo Li and Prof. Karsten Reuter  
Theoretical Chemistry and Catalysis Research Center, Technische Universität München, Lichtenbergstr. 4, 85747 Garching, Germany

Dr. Yuan Wang, Dr. Zhen Su and Prof. Chuan Zhao  
School of Chemistry, Faculty of Science, The University of New South Wales, Sydney, NSW 2052 Australia

Dr. Hongjun Chen and Prof. Antonio Tricoli  
Nanotechnology Research Laboratory, Faculty of Engineering, University of Sydney, NSW 2006, Australia

Dr. Asim Riaz, Dr. Kaushal Vora and Dr. Siva Karuturi  
Department of Electronic Materials Engineering, Research School of Physics, The Australian National University Canberra, ACT 2601, Australia

Prof. Karsten Reuter  
Fritz-Haber-Institut der Max-Planck-Gesellschaft, Faradayweg 4-6, 14195 Berlin, Germany

E-mail: [haobo.li@tum.de](mailto:haobo.li@tum.de); [kylie.catchpole@anu.edu.au](mailto:kylie.catchpole@anu.edu.au); [siva.karuturi@anu.edu.au](mailto:siva.karuturi@anu.edu.au);

Keywords: Electrocatalyst, Ni<sub>3</sub>N synthesis, hydrogen evolution, Si photocathode, nitrogen-vacancies, density functional theory

### **Experimental Methods**

**Materials:** All chemicals were of analytical grade and were used as-purchased without further purification. Aqueous solutions were prepared using high purity water produced from a Millipore

Milli Q Purification system (resistivity  $>18 \text{ M}\Omega \text{ cm}$ ). Conducting FTO glass (purchased from Yingkou Shangneng Photoelectric material Co., Ltd with a sheet resistance of  $7\text{-}9 \text{ }\Omega/\square$ ) was cleaned by sequential ultrasonication in acetone, ethanol, and deionized water for 30 min each.

***Preparation of  $\text{Ni}_3\text{N}$ ,  $\text{Ni}_3\text{N}/\text{Ni}$  and Pt catalysts:***  $\text{Ni}_3\text{N}$  and  $\text{Ni}_3\text{N}/\text{Ni}$  catalysts were deposited on FTO glass using a magnetron sputtering system (ATC 2400, AJA International Inc.) loaded with a Ni sputter target with a direct current power of 150 W and a chamber pressure of 4.0 mTorr at room temperature. The deposition times were optimized to achieve a target film thickness of  $\sim 210 \text{ nm}$ . For the  $\text{Ni}_3\text{N}$  catalyst, the deposition was carried out under a constant flow of Ar and  $\text{N}_2$  gases at 20 SCCM each for 1500 s. For the bilayer  $\text{Ni}_3\text{N}/\text{Ni}$ , a Ni film ( $\sim 70 \text{ nm}$ ) was first deposited under 20 SCCM Ar gas flow for 500 s, followed by  $\text{Ni}_3\text{N}$  ( $\sim 140 \text{ nm}$ ) deposition under a constant flow of Ar and  $\text{N}_2$  gases at 20 SCCM each for 1000 s. Pt films were deposited by the same sputtering system at 150 W under 100% Ar flow using a Pt sputter target. The pressure during the sputtering process was held constant at 4.0 mTorr. The total deposition time was fixed at 1500 s which results in 90 nm-thick Pt films.

The porous substrates have been cleaned in the sonicator sequentially in acetone, ethanol, and deionized water for 30 minutes. It should be noted that NF needs 10 minutes sonication in the 3.0 M diluted HCl solution.

***Fabrication of Si photocathodes:*** N-type (100) Si wafers of  $300 \text{ }\mu\text{m}$  thickness with a phosphorus dopant concentration of  $5 \times 10^{15} \text{ cm}^{-3}$  were used for the fabrication of Si photocathodes. Light harvesting side of the Si photoelectrodes was prepared by texturing with random pyramids by electroless chemical etching in a 45% KOH solution. The textured Si surface was further subjected to boron diffusion ( $\sim 100 \text{ }\Omega \text{ }\square^{-1}$ ) to form a p-n junction, followed by the depositions of a  $\sim 10 \text{ nm}$   $\text{Al}_2\text{O}_3$  using atomic layer deposition and  $\sim 65 \text{ nm}$  of  $\text{SiN}_x$  using plasma-enhanced chemical vapour

deposition as passivation and antireflection layers, respectively. Finally, the light harvesting surface was patterned via photolithography and metallized with a grid of 10  $\mu\text{m}$  width lines and 1.3 mm pitch, deposited from thermal evaporation of a Cr ( $\sim 10$  nm)/Pd ( $\sim 10$  nm)/Ag ( $\sim 100$  nm) stack, followed by thickening with Ag electroplating. The back surface of the resulting Si structure was prepared for the HER in direct contact with the electrolyte solution. Microgrooves were formed on the surface by etching in a maskless reactive ion etching system using  $\text{SF}_6/\text{O}_2$  plasma, followed by wet chemical etching in a HF and HCl containing solution. The structured surface was then subjected to thermal diffusion of  $\text{POCl}_4$  to obtain a phosphorous dopant concentration of  $3 \times 10^{20} \text{ cm}^{-3}$ . Si photocathodes were prepared by sputtering either  $\text{Ni}_3\text{N}/\text{Ni}$  or Pt as cocatalysts on the phosphorous diffused Si surface adopting the deposition processes as described above. A Ti layer with a thickness of  $\sim 30$  nm was introduced between Si and catalysts to improve the band energetics and alleviate charge recombination. Cu metal wires were attached to Ag busbar on the light harvesting side using Ag paste, which was then sealed with a quartz sheet using epoxy (Hysol 11C) to protect from corrosion in the electrolyte.

***Material Characterizations:*** SEM characterizations to obtain surface and cross-sectional images of the synthesized samples were carried out using a Helios Nanolab 600 FIB system. Prior to the preparation of cross-sectional lamellas using the FIB system, a layer of Pt was deposited on the samples within system to avoid damage from Ga ion milling. The crystallinity of the samples was examined by XRD measurements on a Bruker system (D Phaser, USA) equipped with Cu  $K\alpha$  radiation with an average wavelength of 1.54059 Å. The typical scan range ( $2\theta$ ) was  $10^\circ$  to  $80^\circ$  collected with a step size of  $0.039^\circ \text{ s}^{-1}$ . The TEM and HRTEM images were obtained on a JEF2100 (JEOL company) with an acceleration voltage of 200 kV. XPS measurements were performed with Thermo ESCALAB250i. The high-resolution measurements were conducted with 500  $\mu\text{m}$  spot size

and a pass energy of 20 eV. To ensure the consistency of the results, the scan was performed at 4 different spots. The binding energies reported in this study were calibrated to adventitious hydrocarbon at 284.8 eV.

***Electrochemical characterizations:*** Current density vs. potential curves were recorded with a commercial potentiostat (CHI760D electrochemical workstation) in a standard three-electrode configuration, with a Luggin capillary joining the reference electrode (RE) to the working electrode (WE) compartment. A graphite rod and a Ag/AgCl were used as the CE and RE, respectively. The measured current values were converted to current density values by dividing them with the geometric areas of the cathodes after encapsulation. Electrochemical measurements were carried out in 1.0 M KOH aqueous solution. Applied potential was swept from -0.4 to 0.1 V vs. RHE at a scanning rate of 5 mV s<sup>-1</sup>. All the electrochemical experiments were carried out at room temperature (25 °C). The overpotential values for different electrodes were collected at steady-state currents of 10 mA cm<sup>-2</sup> from chronopotentiometry measurements.

The faradaic efficiency of HER catalyzed by Ni<sub>3</sub>N/Ni electrodes was measured in a H-type electrochemical cell with a Nafion membrane separator. Gas samples were collected using an airtight syringe at every 15 min intervals and injected into a gas chromatography (SHIMADZU GC-2030 system, TCD, Argon carrier) for the detection of the generated hydrogen. Before measurement, the reaction system was thoroughly degassed with ultrapure nitrogen to expel the entrapped air. Then, a constant current density of 10 mAcm<sup>-2</sup> was applied to the electrode and the concentration of hydrogen was analyzed. Calibrations were carried out using a similar setup but with two cleaned Pt foils as working and counter electrodes, respectively. Electrochemical impedance spectroscopy (EIS) was carried out at an overpotential of 50 mV vs. RHE and an AC potential frequency ranging from 100 kHz to 10 mHz. The EIS measurement of zero-gap cells was carried out at a potential of 1.6 V and

an AC frequency ranging from 100 kHz to 100 mHz. The program ZView (Scribner Associates Inc.) was used to fit the obtained data to a corresponding equivalent circuit model.

**Photoelectrochemical characterizations:** The PEC characterizations including LSV and chronoamperometry were performed using a potentiostat (Autolab PGSTAT302N) in a three-electrode configuration. Ag/AgCl and Pt were used as reference and counter electrodes, respectively, in 1.0 M KOH solution under AM1.5G illumination. The electrode potentials versus Ag/AgCl were converted to RHE potentials according to the Nernst equation. Prior to open-circuit potentials measurements, the photoelectrodes were placed under repeated potential cycling at a scan rate of 20 mV s<sup>-1</sup> in 1.0 M KOH electrolyte until a stabilized cyclic voltammogram was obtained under illumination. And the electrolyte was deoxygenated by bubbling with ultrahigh purity N<sub>2</sub> for 30 min and maintained under N<sub>2</sub> atmosphere during the measurements with 50 s illumination intervals. The current-voltage results from the LSV measurements were converted to the ABPE values using the previously reported method. The IPCE measurements were taken in a three-electrode configuration as a function of wavelength from 300 to 1200 nm using a 1000 W Xe lamp equipped with gratings to generate a monochromatic beam.

**Zero-gap electrolyser measurements:** Fumapem FA-3-50 anionic membrane, 5 cm<sup>2</sup> Ni flow field electrode plates and NiFe<sub>2</sub>O<sub>4</sub> anode were acquired from Dioxide Materials. The Ni<sub>3</sub>N/Ni cathodes were prepared on various porous substrates via sputtering technique as described above. The membrane was activated by soaking it for 24 hr in 1.0 M KOH solution prior to use. A 5 x 5 cm<sup>2</sup> membrane was sandwiched between the NiFe<sub>2</sub>O<sub>4</sub> anode and a cathode along with Teflon gaskets with an opening window of 1 cm<sup>2</sup>. 1.0 M KOH electrolyte at 3 ml min<sup>-1</sup> was fed into the inlets of cathode and anode flow field end plates, while the output was collected into an electrolyte reservoir. A potentiostat (Autolab PGSTAT302N) was used for the electrochemical current-voltage

measurements. The cathode plate and anode plates were connected to the working and counter electrode terminals. The zero-gap electrolyser was kept at 55 °C during the measurements.

**DFT calculations:** All DFT calculations were performed with the plane wave DFT code QuantumESPRESSO (QE)<sup>1</sup> using the van der Waals-corrected BEEF-vdW exchange correlation function<sup>2</sup> with density and wave function cut-offs of 6000 eV and 600 eV, respectively. Adsorption was modelled at fully optimized symmetric slabs, separated by a vacuum region of at least 20 Å. All the structures were fully relaxed until residual forces fell below 0.03 eV/Å. Reciprocal space sampling was performed with a (2 × 2 × 1) k-point mesh. Test calculations with higher wave function cut-offs up to 800 eV and k-point grids up to (4 × 4 × 1) indicate the obtained H\* adsorption energies to be converged within 0.03 and 0.02 eV, respectively. The Ni<sub>3</sub>N<sub>1-x</sub> material was modelled by a (2 × 2) unit-cell of the (001) facet of hexagonal Ni<sub>3</sub>N<sup>3</sup> with 7 Ni<sub>3</sub>N layers, while a (2 × 2) unit-cell of Ni(111) with 7 Ni layers was used for comparison. Solvation effects were considered within an implicit solvation approach using the Environ module provided with QE.<sup>4</sup> The relative permittivity value of the dielectric layer was set to 78.3 to simulate water.

**Adsorption free energy calculations:** The adsorption free energies of H\* ( $G_H$ ) at standard conditions are conveniently calculated as  $G_H = E_H + ZPE + \int C_p dT - TS$ , where  $E_H$  is the adsorption energy of H\* that additionally includes free energy contributions to the free adsorbate, ZPE is the zero-point energy,  $\int C_p dT$  is the enthalpic temperature correction and  $TS$  is the entropic correction.  $E_H$  is calculated as  $E_H = E_{\text{surf+H}} - E_{\text{surf}} - \mu(\text{H})$ , where  $E_{\text{surf+H}}$  is the DFT total energy of the surface adsorbed with H\*,  $E_{\text{surf}}$  is the energy of the corresponding pristine surface and  $\mu(\text{H})$  is the chemical potential of H\* referenced to H<sub>2</sub>(g). More negative  $G_H$  values indicate a stronger binding.

**Ab Initio Thermodynamics Approach:** The  $Ni_3N_{1-x}$  catalysts can have Ni-, N- and NH- terminations at the surface and different N vacancies concentrations. The composition is considered as  $Ni_xN_yH_z$ . The phase diagrams are calculated by evaluating the surface free energy  $\gamma$ . Within the *ab initio* thermodynamics approach,  $\gamma$  is defined as:

$$\gamma = \frac{1}{2A} [G_{surf}(Ni_xN_yH_z) - x\mu_{Ni} - y\mu_N - z\mu_H] \quad . \quad (1)$$

$G_{surf}(Ni_xN_yH_z)$  is the Gibbs free energy of the surface candidate structure, described via a symmetric slab model with two equivalent surfaces of surface unit-cell area  $A$  and containing  $x$  Ni atoms,  $y$  N atoms and  $z$  H atoms.  $\mu_{species}$  indicate the chemical potentials of the respective species.

1) The catalyst was synthesized from Ni and nitrogen gas plasma and with the composition of  $Ni_xN_y$ :

$$\mu_{Ni} = E_{bulk}(Ni) \quad . \quad (2)$$

$$\mu_N = \Delta\mu_N + \frac{1}{2}E_{N_2(molecule)} + \frac{1}{2}F_{N_2}^{vib} \quad . \quad (3)$$

2) The HER working condition is in the solution and the catalyst surface can be terminated by NH group with the composition of  $Ni_xN_yH_z$ , depending on the bias  $U$  and  $pH$ .  $\mu_N$  is referenced to  $N_2$ :

$$\mu_N = \frac{1}{2}E_{N_2(molecule)} + \frac{1}{2}F_{N_2}^{vib} + k_B T \ln(c) \quad . \quad (4)$$

$$\mu_H = \frac{1}{2}E_{H_2(molecule)} + \frac{1}{2}F_{H_2}^{vib} + eU_{SHE} - k_B T \log_{10}(pH) \quad . \quad (5)$$

$c$  is the solubility of  $N_2$  in water at standard conditions. From the approximate  $N_2$  solubility 20 mg/L,  $c$  is  $1.29 \times 10^{-5}$  mole fraction.

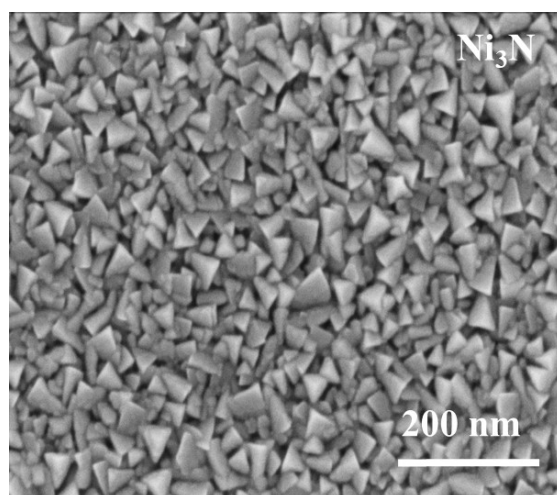

**Fig. S1.** Scanning electron microscopy image of  $\text{Ni}_3\text{N}/\text{Ni}$  on FTO.

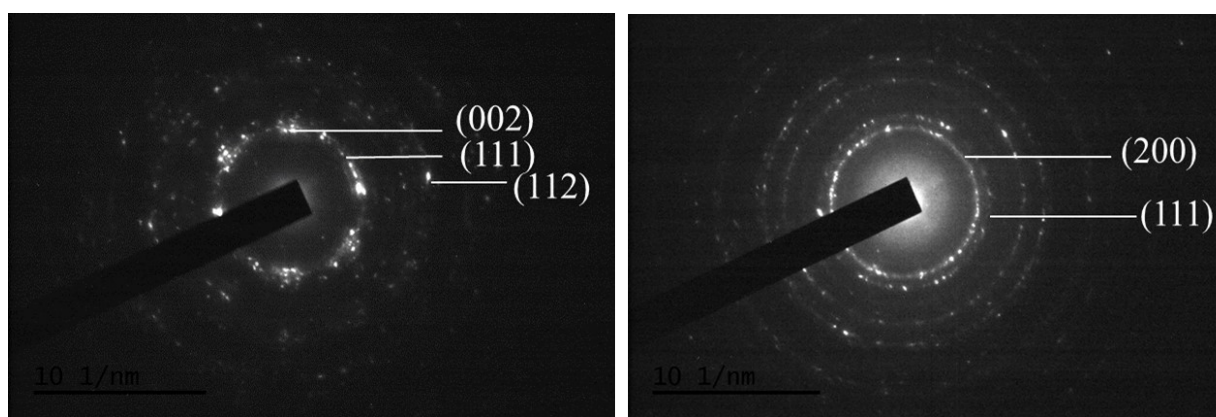

**Fig. S2.** Selected area electron diffraction patterns collected from (a) block 1 ( $\text{Ni}_3\text{N}$ ) and (b) block 2 (Ni). Block 1 and 2 are the areas as marked in Fig. 2d in the manuscript.



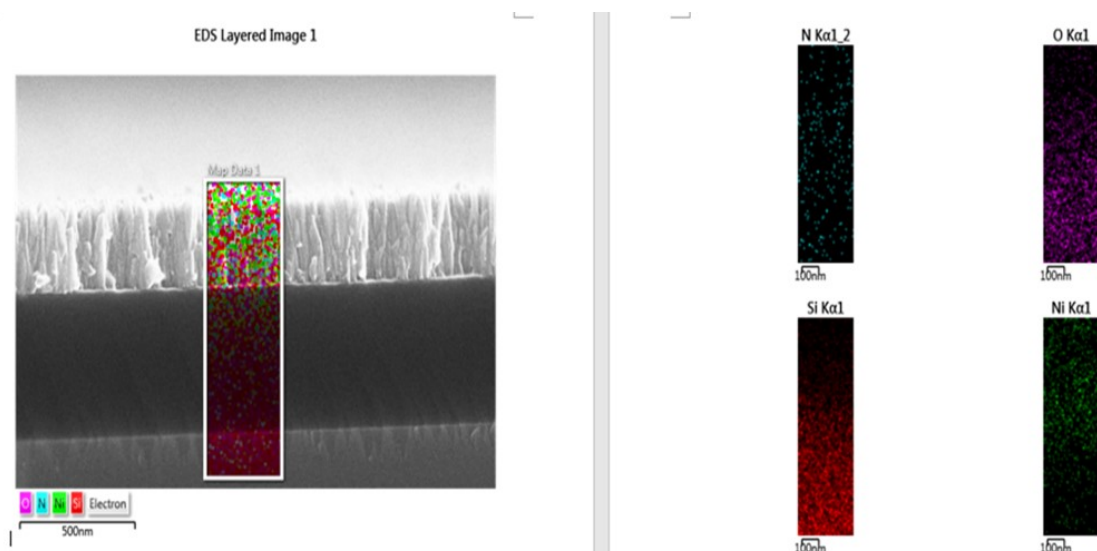

**Fig. S3.** Elemental mapping images obtained from the cross-section of Ni<sub>3</sub>N/Ni film.

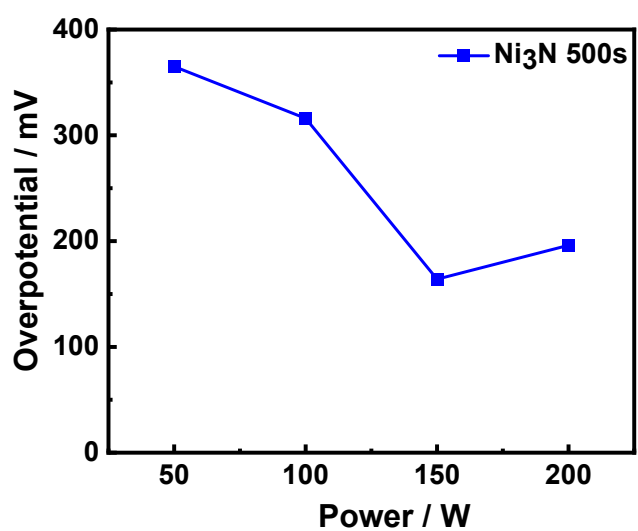

**Fig. S4.** Overpotential at 10 mA cm<sup>-2</sup> of Ni<sub>3</sub>N/FTO electrodes deposited at different sputtering powers for 500 s for the hydrogen evolution reaction in 1.0 M KOH solution.

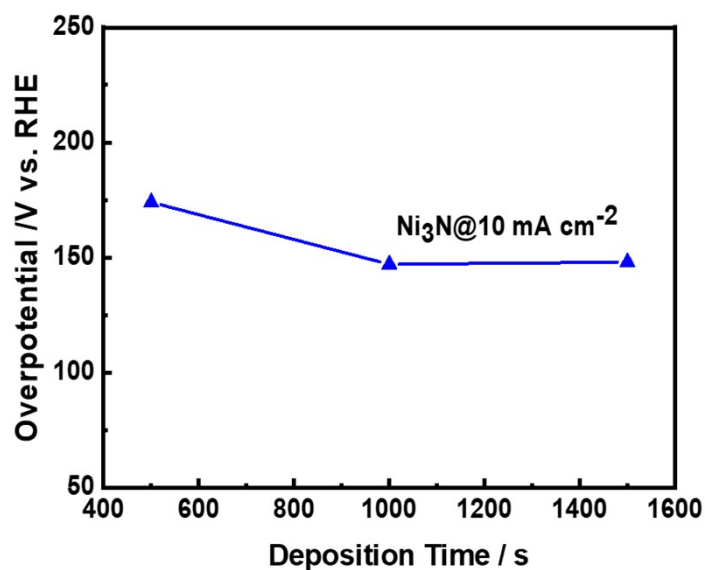

**Fig. S5.** Overpotential at  $10 \text{ mA cm}^{-2}$  of  $\text{Ni}_3\text{N}/\text{FTO}$  cathodes deposited with different sputtering durations for the hydrogen evolution reaction in  $1.0 \text{ M KOH}$  solution.

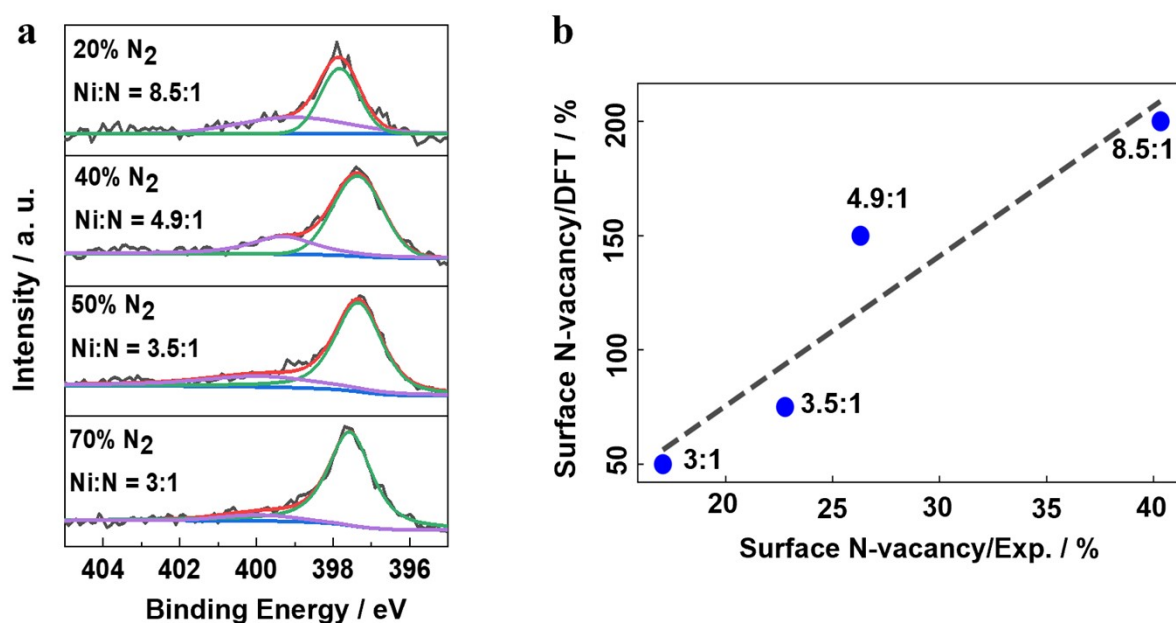

**Fig. S6.** (a) N  $1s$  XPS spectra of a series of  $\text{Ni}_3\text{N}$  catalysts sputtered under different  $\text{N}_2$ : Ar ratios. (b) Benchmark of experimental numerical area of N-vacancies in XPS with theoretical N-vacancies used for DFT calculations. The fitted linear relationship between experimental and computational data is shown as black dashed line, with the experimental mixture gas Ni:N ratio given as inset.

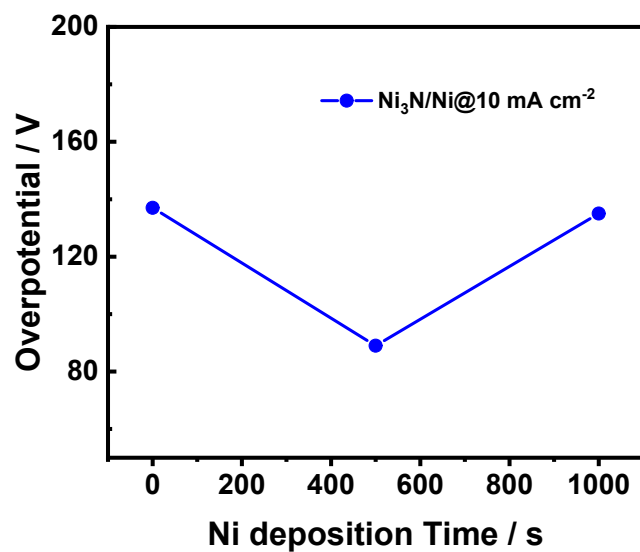

**Fig. S7.** Overpotential at  $10 \text{ mA cm}^{-2}$  of  $\text{Ni}_3\text{N}/\text{Ni}/\text{FTO}$  cathodes deposited with different sputtering durations of Ni, followed by sputtering of  $\text{Ni}_3\text{N}$  for 1000 s for the hydrogen evolution reaction in 1.0 M KOH solution.

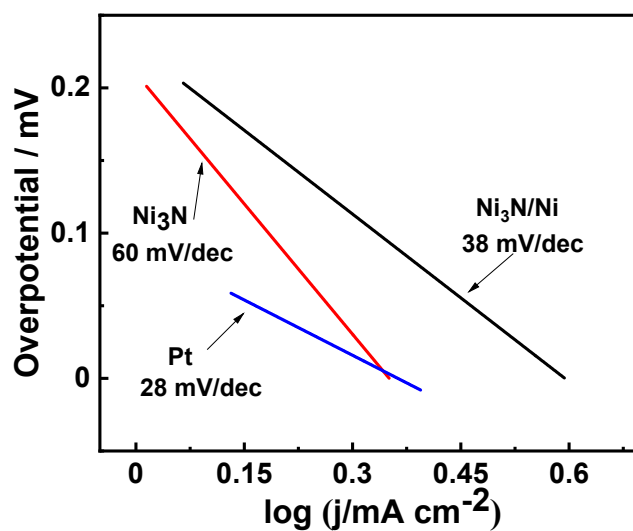

**Fig. S8.** Tafel plots of  $\text{Ni}_3\text{N}/\text{Ni}/\text{FTO}$ ,  $\text{Ni}_3\text{N}/\text{FTO}$ , and Pt/FTO electrodes derived from their polarization curves presented in Fig. 4b in the manuscript.

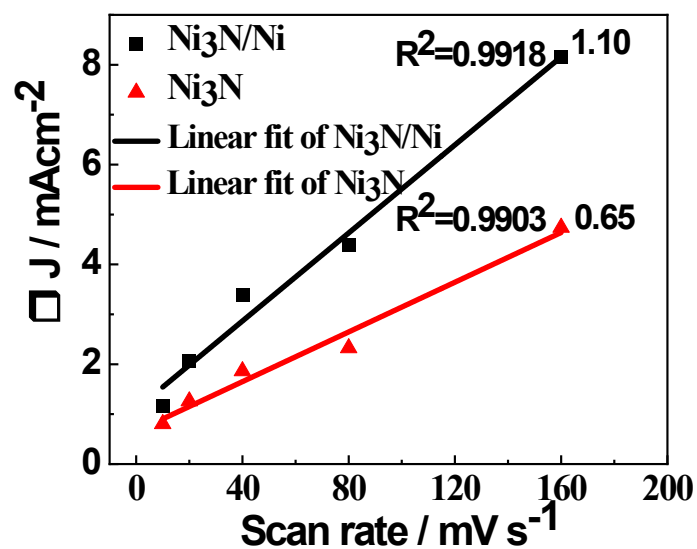

**Fig. S9.** The linear fittings of the capacitive currents of Ni<sub>3</sub>N/Ni and Ni<sub>3</sub>N electrodes as a function of scan rate.

**Table S1.** The EIS data of different cathodes

| Samples              | R <sub>s</sub> (Ω cm <sup>2</sup> ) | CPE-T     | CPE-P   | R <sub>ct</sub> (Ω cm <sup>2</sup> ) |
|----------------------|-------------------------------------|-----------|---------|--------------------------------------|
| Ni <sub>3</sub> N/Ni | 9.799                               | 3.7626E-4 | 1.004   | 16.19                                |
| Ni <sub>3</sub> N    | 9.43                                | 3.0513E-4 | 0.99521 | 33.47                                |
| Pt                   | 8.252                               | 4.1194E-3 | 0.6317  | 3.82                                 |

**Table S2. Comparison of the HER activity of Ni<sub>3</sub>N/Ni on FTO with other earth-abundant electrocatalysts on planar substrates in 1.0 M KOH**

| Catalysts                                                           | Substrate               | Tafel slope (mV/decade) | Overpotential V vs. RHE at -10 mA cm <sup>-2</sup> | J <sub>0</sub> (mA cm <sup>-2</sup> ) | Stability          | Reference                                   |
|---------------------------------------------------------------------|-------------------------|-------------------------|----------------------------------------------------|---------------------------------------|--------------------|---------------------------------------------|
| Ni <sub>3</sub> N/Ni                                                | FTO                     | 38                      | 89 (with iR-compensation)                          | 0.99                                  | 75 h               | This Work                                   |
| Ni <sub>3</sub> N nanosphere                                        | Ni foil                 | /                       | 185                                                | /                                     | /                  | Adv. Energy Mater. 2017, 7, 1601735         |
| Ni <sub>11</sub> (HPO <sub>3</sub> ) <sub>8</sub> (OH) <sub>6</sub> | FTO                     | /                       | 336                                                | /                                     | /                  | Energy Environ. Sci. 2018,11, 1287-1298     |
| Ni <sub>2</sub> P NP                                                | Glass carbon electrode  | 100                     | 225 (with iR-compensation)                         | /                                     | 48 h               | Phys. Chem. Chem. Phys. 2014, 16, 5917-5921 |
| Ni <sub>3</sub> FeN                                                 | Glassy carbon electrode | 42                      | 158                                                | /                                     | 9 h                | Adv. Energy. Mater. 2016, 6, 1502585        |
| Ni <sub>3</sub> P <sub>4</sub> nanosheets                           | Ni foil                 | 53                      | 150                                                | /                                     | 20 h               | Angew. Chem. Int. Ed. 2015, 54, 12361       |
| Co-P                                                                | Cu foil                 | 42                      | 94 (with iR-compensation)                          | /                                     | 24 h               | Angew. Chem. Int. Ed. 2015, 127, 6349-6352  |
| MoC <sub>x</sub>                                                    | Cu                      | 53                      | 142                                                | 0.029                                 | 10 h               | Nat. Commun. 2015, 6, 6512                  |
| Mo <sub>2</sub> N                                                   | Glassy carbon electrode | 108                     | 353                                                | /                                     | 1000 cycles        | J. Mater. Chem. A 2015, 3, 8361             |
| Mo <sub>2</sub> C (10nm)                                            | FTO                     | 78                      | 270                                                | 4.4 × 10 <sup>-3</sup>                | 10 h (20% degrade) | J. Am. Chem. Soc. 2015, 137, 22, 7035-7038  |
| TiO <sub>2</sub> /Ni/Ni Mo                                          | FTO                     | /                       | 200                                                | /                                     | 40 min             | J. Mater. Chem. A, 2016, 4, 6842–6852       |
| MoVN                                                                | Carbon paper            | 60                      | 108                                                | /                                     | 3000 cycles        | Electrochem. Commun. 93 (2018) 166-170      |

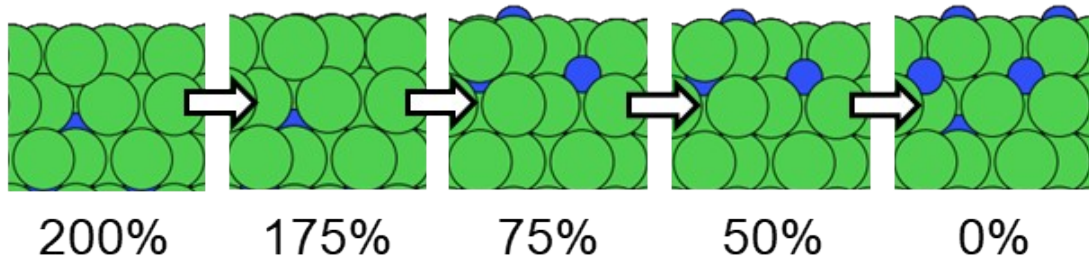

**Fig. S10.** Atomic structures of  $\text{Ni}_x\text{N}_y$  surface in Fig. 5a with N-vacancies of 200%, 175%, 75%, 50%, 0%, respectively. The perfect  $\text{Ni}_x\text{N}_y$  surface with 0% N-vacancies is formed by alternative N and Ni atomic layers, i.e., “N-Ni-N-Ni-N-Ni...”, while a defected surface with 100% N-vacancies corresponds to a fully N-removed surface layer, i.e., “Ni-N-Ni-N-Ni...”, and 200% N-vacancies corresponds to first two surface layers which are fully N-removed, i.e., “Ni-Ni-N-Ni-...”.

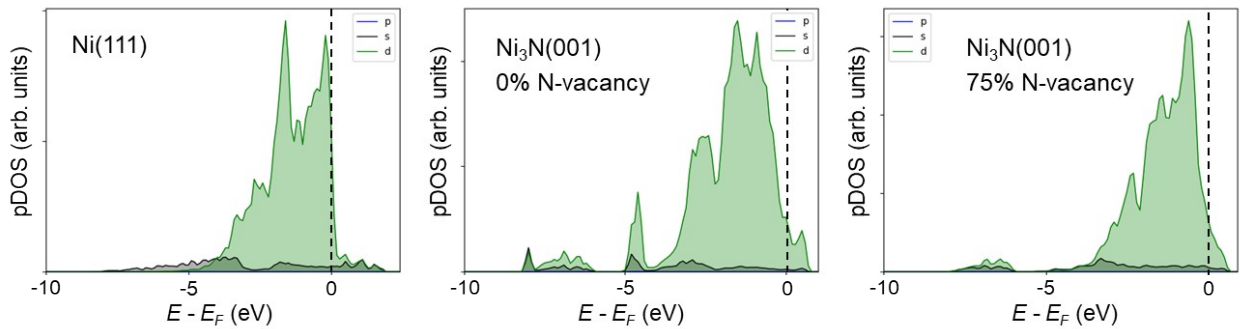

**Fig. S11.** Projected electronic density of states (pDOS) for surface Ni atoms on Ni(111),  $\text{Ni}_3\text{N}(001)$  with 0% and 75% surface N-vacancies. The Fermi-level is used as zero reference. There is no obvious band gap near the Fermi level, which shows that the three surfaces are all metallic. The corresponding  $d$ -band center positions are shown in Fig. S12.

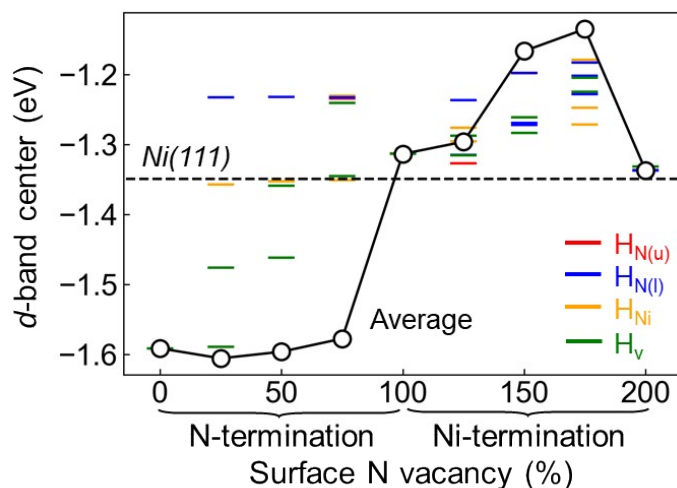

**Fig. S12.** *d*-band center position (with respect to  $E_F$ ) of 4 inequivalent  $\text{Ni}_3$ -hollow sites exhibited by a  $\text{Ni}_3\text{N}(001)$  surface with varying degree of surface N vacancies. The corresponding values for the  $\text{Ni}_3$ -hollow sites at  $\text{Ni}(111)$  are shown as dashed line for comparison (the two inequivalent sites share the same value). The average value of the surface Ni atoms for each termination are marked as circles.

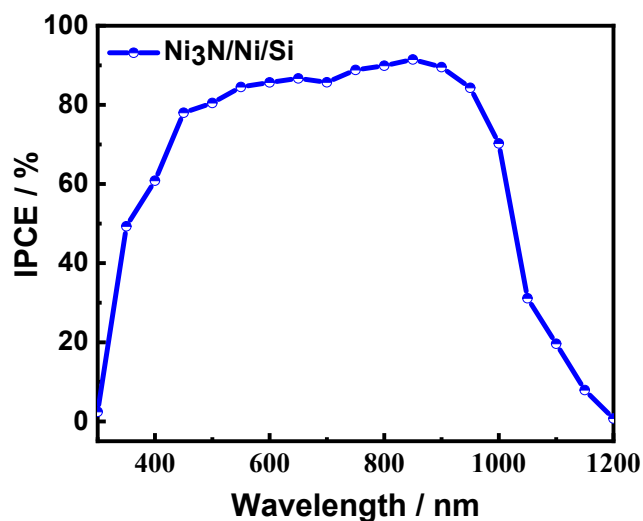

**Fig. S13.** Incident photon-to-current efficiency of  $\text{Ni}_3\text{N}/\text{Ni}/\text{Si}$  photocathode at 0 V vs RHE. The measurement was performed in 1.0 M KOH electrolyte (pH=14) using a light source equipped with a monochromator.

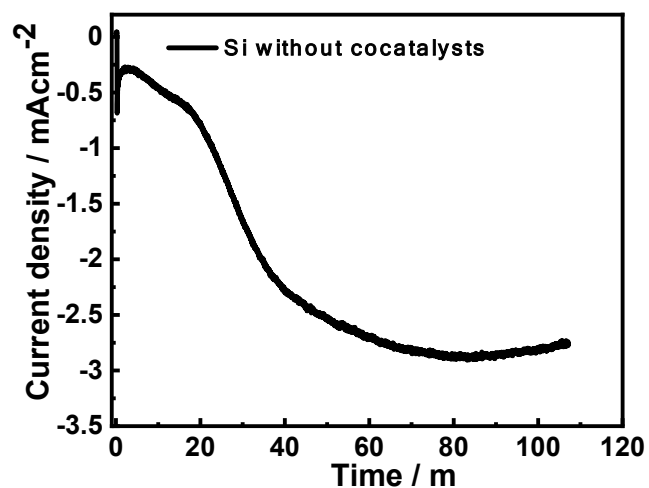

**Fig. S14.** Chronoamperometry measurements for the Si photocathode without cocatalysts at 0 V vs. RHE in 1.0 M KOH electrolyte under AM1.5 illumination.

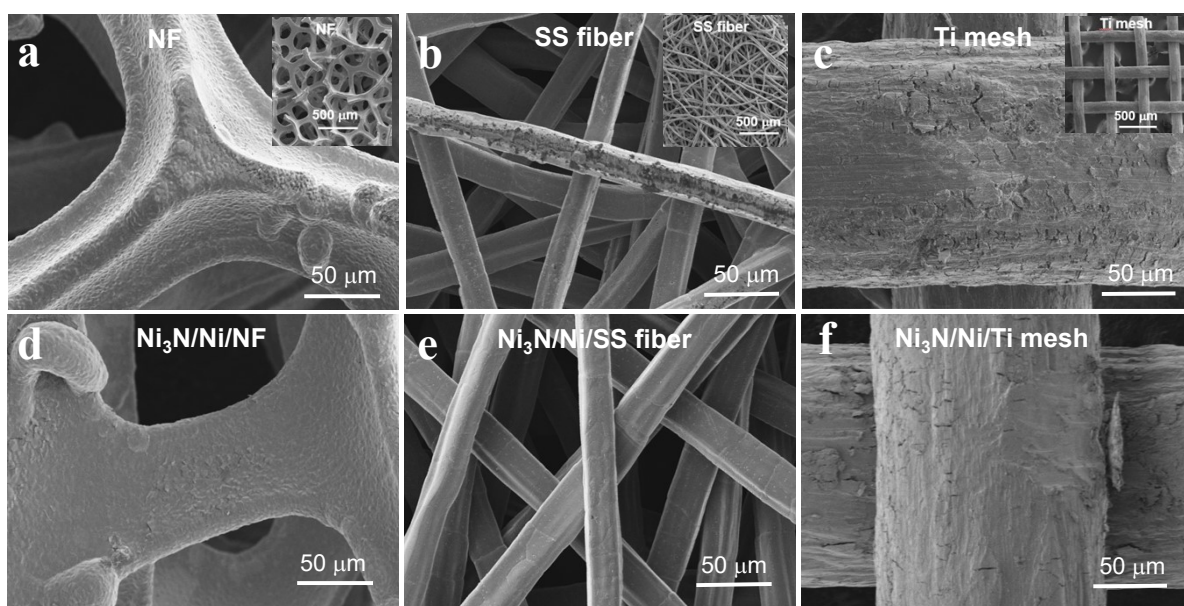

**Fig. S15.** Scanning electron microscopy (SEM) images of (a-c) blank porous substrates with a scale bar of 50  $\mu\text{m}$ . The insets show low magnification SEM images of the porous substrates with a scale bar of 500  $\mu\text{m}$ . (d-f) SEM images of porous substrates coated with  $\text{Ni}_3\text{N}/\text{Ni}$  with a scale bar of 50  $\mu\text{m}$ .



**Table S3. The comparison of the performance of Ni-based nitrides on porous substrates in 1.0 M KOH**

| Catalyst                           | Substrate    | Fabrication Method                      | Tafel slope (mV dec <sup>-1</sup> ) | Overpotential V vs. RHE at -10 mA cm <sup>-2</sup> | Stability | Reference                              |
|------------------------------------|--------------|-----------------------------------------|-------------------------------------|----------------------------------------------------|-----------|----------------------------------------|
| Ni <sub>3</sub> N/Ni               | Ni foam      | Magnetron sputtering                    | 38                                  | 66                                                 | 139 h     | This Work                              |
| Ni <sub>3</sub> N <sub>1-x</sub>   | Ni foam      | Microwave plasma                        | 54                                  | 55                                                 | 50 h      | Adv. Sci. 2018, 5, 1800406             |
| Ni <sub>3</sub> N/Ni               | Ni foam      | Electrodeposition + thermal nitridation | 29.3                                | 12                                                 | 24 h      | Nat. Commun. 2018,9, 4531              |
| NiMoN/Ni <sub>3</sub> N            | Ni foam      | Hydrothermal+ thermal treatment         | 49                                  | 28                                                 | 24 h      | Appl. Surf. Sci. 2021, 540, 148407     |
| Cu <sub>1</sub> Ni <sub>2</sub> -N | Fiber cloth  | Solvothermal+ calcination               | 106.5                               | 71.4                                               | 60 h      | Adv. Energy Mater. 2019, 9, 1900390    |
| Ni <sub>3</sub> N                  | Ni foam      | Calcination                             | 109                                 | 121                                                | 32 h      | Electrochimica Acta.2016, 191, 841–845 |
| MNiNS                              | Ni foam      | Calcination                             | 58.8                                | 119                                                | 12 h      | J. Mater. Chem. A, 2019, 7, 8117-8121  |
| CoN/Ni <sub>3</sub> N              | Carbon cloth | Hydrothermal +calcination               | 69                                  | 78                                                 | 24 h      | J. Mater. Chem. A, 2018, 6, 4466-4476  |

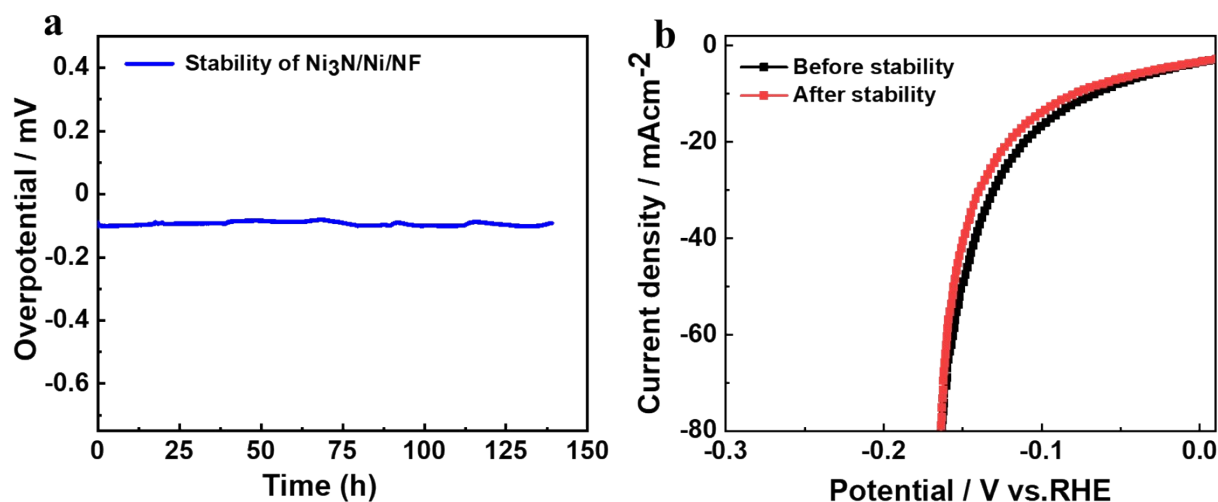

**Fig. S16.** (a) Chronopotentiometry measurement for  $\text{Ni}_3\text{N}/\text{Ni}/\text{NF}$  electrode at a current density of  $15 \text{ mA cm}^{-2}$  in  $1.0 \text{ M KOH}$  in three-electrode configuration. (b) LSV measurements of  $\text{Ni}_3\text{N}/\text{Ni}/\text{NF}$  electrode before and after the stability test.

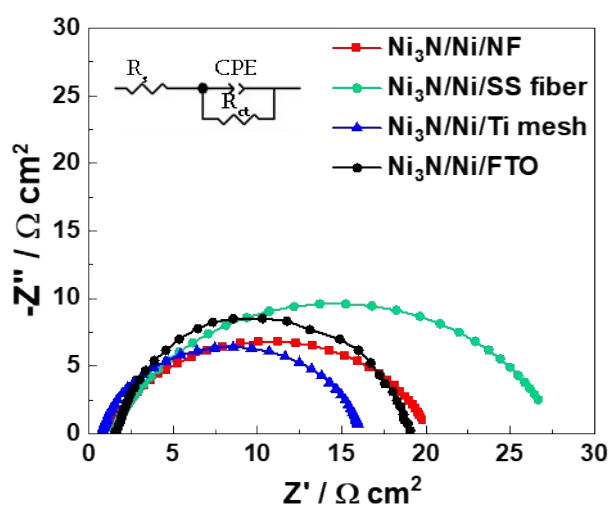

**Fig. S17.** The Nyquist plots of  $\text{Ni}_3\text{N}/\text{Ni}$  catalyst on different substrates in three-electrode configuration with  $\text{Ag}/\text{AgCl}$  reference electrode and  $\text{Pt}$  counter electrode. Electrochemical impedance spectroscopy (EIS) was carried out at an overpotential of  $50 \text{ mV vs. RHE}$ . The inset shows the Randles circuit. Here,  $R_{\text{ct}}$  is charge transfer resistance of the electrode,  $R_{\text{s}}$  is the series resistance due to wires, contacts, and solution which complete the circuit, and CPE is the constant-phase element which represents the interfacial capacitance.

**Table S4. The fitted EIS data of different Ni<sub>3</sub>N/Ni coated electrodes**

| Electrode                     | R <sub>s</sub> (Ω cm <sup>2</sup> ) | CPE-T      | CPE-P   | R <sub>ct</sub> (Ω cm <sup>2</sup> ) |
|-------------------------------|-------------------------------------|------------|---------|--------------------------------------|
| Ni <sub>3</sub> N/Ni/FTO      | 9.799                               | 3.7626E-4  | 1.004   | 16.19                                |
| Ni <sub>3</sub> N/Ni/NF       | 1.2266                              | 2.00551E-3 | 1.031   | 19.00                                |
| Ni <sub>3</sub> N/Ni/SS fiber | 1.4619                              | 6.31576E-3 | 0.88504 | 26.28                                |
| Ni <sub>3</sub> N/Ni/Ti mesh  | 0.75121                             | 2.4985E-3  | 0.70781 | 15.36                                |

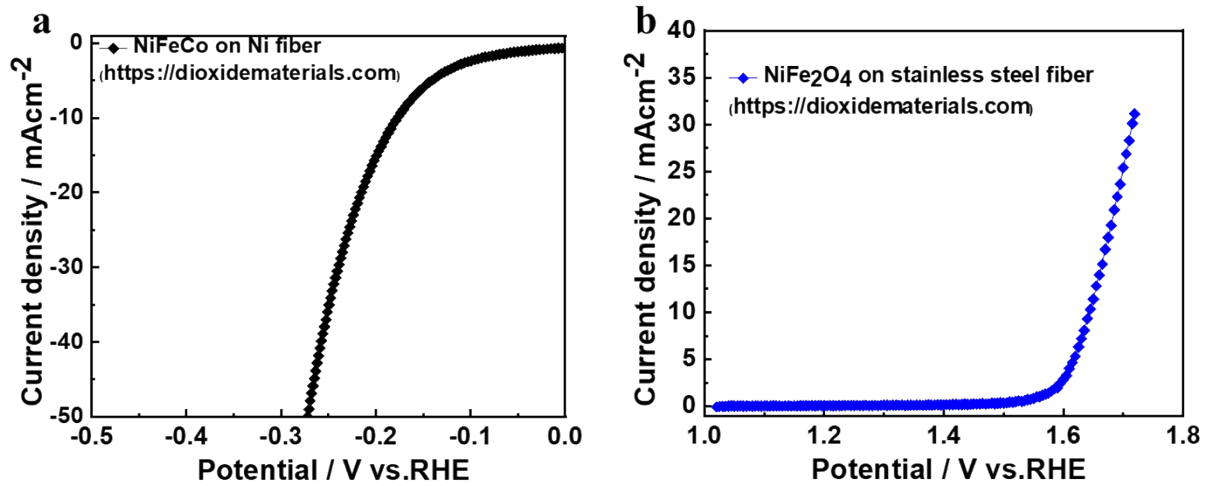

**Fig. S18.** Linear sweep voltammetry curves (with 90% iR-compensation) of commercial HER and OER electrodes obtained from Dioxide Materials Inc. measured in 1.0 M KOH.

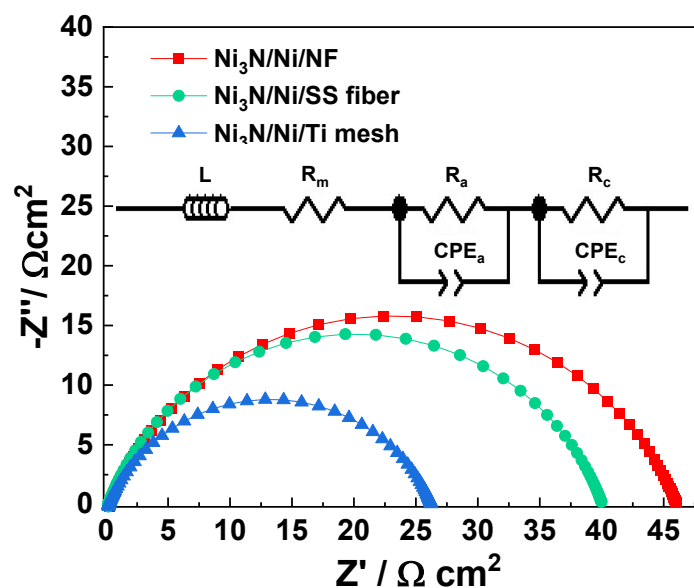

**Fig. S19.** The Nyquist plots of different porous electrodes in zero-gap cell configuration. The inset is the equivalent circuit model. Here,  $R_m$  is membrane resistance,  $R_a$  anode resistance,  $R_c$  cathode resistance, and  $CPE_a$  and  $CPE_c$  are constant phase elements of anode and cathode, respectively.

**Table S5. The fitted EIS data of different porous electrodes in zero-gap cell**

| Electrode                     | $R_m$ ( $\Omega\text{cm}^2$ ) | $R_a$ ( $\Omega\text{cm}^2$ ) | $R_c$ ( $\Omega\text{cm}^2$ ) |
|-------------------------------|-------------------------------|-------------------------------|-------------------------------|
| Ni <sub>3</sub> N/Ni/NF       | 0.22984                       | 0.006                         | 45.82                         |
| Ni <sub>3</sub> N/Ni/SS fiber | 0.16516                       | 0.006                         | 39.88                         |
| Ni <sub>3</sub> N/Ni/Ti mesh  | 0.15645                       | 0.006                         | 26.06                         |

**Table S6. Performance comparison of Ni-based electrodes in single cell water electrolysis cell at a current density of 0.5 A cm<sup>-2</sup>**

| Cathode                              | Anode                                      | E <sub>cell</sub> /V           | Electrolyte, temperature | References                                      |
|--------------------------------------|--------------------------------------------|--------------------------------|--------------------------|-------------------------------------------------|
| Ni <sub>3</sub> N/Ni/Ti mesh         | NiFe <sub>2</sub> O <sub>4</sub> /SS fiber | 1.88                           | 1 M KOH, 329.15 K        | Our work                                        |
| NiCoFe/Ni fiber                      | NiFe <sub>2</sub> O <sub>4</sub> /SS fiber | 1.86                           | 1 M KOH, 329.15 K        | Int. J. Hydrogen Energy, 2017, 42, 29661-29665. |
| MoNi <sub>4</sub> /MoO <sub>2</sub>  | NiFe-BTC-GNPs MOF                          | 1.85 (450 mAcm <sup>-2</sup> ) | 0.1 M KOH, 343.15K       | Energy Environ. Sci., 2020, 13, 3447-3458       |
| NiMo-NH <sub>3</sub> /H <sub>2</sub> | Fe-NiMo-NH <sub>3</sub> /H <sub>2</sub>    | 1.57 (1 Acm <sup>-2</sup> )    | 1 M KOH, 353.15 K        | Adv. Energy Mater,2020, 10, 2002285             |
| NiFeCo                               | NiFe <sub>2</sub> O <sub>4</sub>           | 1.9 @1 Acm <sup>-2</sup>       | 1 M KOH, 334.15 K        | Frontiers in Chemistry. 2018, 263               |
| Uncoacted Ni                         | NiFe(OH) <sub>2</sub>                      | 2.23                           | 4 M NaOH, 333 K          | Int. J. Hydrogen Energy, 2012, 37, 7429-7435    |
| High area Ni                         | NiFe(OH) <sub>2</sub>                      | 2.07                           | 4 M NaOH, 333 K          | Int. J. Hydrogen Energy, 2012, 37, 7429-7435    |
| NiAl                                 | NiFe(OH) <sub>2</sub>                      | 2.06                           | 4 M NaOH, 333 K          | Int. J. Hydrogen Energy, 2012, 37, 7429-7435    |
| NiS                                  | NiFe(OH) <sub>2</sub>                      | 1.95                           | 4 M NaOH, 333 K          | Int. J. Hydrogen Energy, 2012, 37, 7429-7435    |
| NiMo                                 | NiFe(OH) <sub>2</sub>                      | 1.90                           | 4 M NaOH, 333 K          | Int. J. Hydrogen Energy, 2012, 37, 7429-7435    |

#### References:

1. P. Giannozzi, S. Baroni, N. Bonini, M. Calandra, R. Car, C. Cavazzoni, D. Ceresoli, G. L. Chiarotti, M. Cococcioni and I. Dabo, *Journal of physics: Condensed matter*, 2009, **21**, 395502.
2. C. Guillaume, J. Morniroli, D. Frost and G. Serghiou, *Journal of Physics: Condensed Matter*, 2006, **18**, 8651.
3. J. Wellendorff, K. T. Lundgaard, A. Møgelhøj, V. Petzold, D. D. Landis, J. K. Nørskov, T. Bligaard and K. W. Jacobsen, *Physical Review B*, 2012, **85**, 235149.
4. N. G. Hörmann, Z. Guo, F. Ambrosio, O. Andreussi, A. Pasquarello and N. Marzari, *npj Computational Materials*, 2019, **5**, 1-6.

#### Author Contributions

D. Zhang: Writing - original draft, data curation, formal analysis. H. Li and K. Reuter: DFT calculation and discussion, and draft review; A. Riaz, A. Sharma, W. Liang, Y. Wang, H. Chen, K. Vora, D. Yan and Z. Su: Data collection, analysis and discussion. A. Tricoli, C. Zhao and F. Beck: Data analysis, and draft review & editing; K. Catchpole: Data analysis, draft review and supervision, and S. Karuturi: Conceptualization, writing - review & editing, supervision.
